# Supplementary material for: Cultural Norms and Practices of Birth Preparedness among Indigenous Maasai Women in Northern Tanzania: A Descriptive Qualitative Study
Source: Research Square preprint supplement (doi:10.21203/rs.3.rs-5804566/v1), 2025-01-16
Supplement: Supplementary file 1 [file 1976e67c9e3ac67d5df4534f.pdf]

## **Focus Group Discussion Guide**

### **1. Introduction and consent.**

1. Begin by welcoming participants, introducing yourself, and explaining the purpose of the interview.
2. Seek informed consent from participants to ensure they are willing to participate
3. Ensure confidentiality and explain how data will be used

### **2. Background information: Background characteristics of the participant's**

#### **a. social demographic characteristics**

- 1) Age
- 2) Educational level
- 3) Average income

#### **b. Past obstetric characteristic**

- 1) Parity
- 2) place of delivery

### **3. The Maasai community has a rich cultural heritage regarding traditional birth preparedness.**

Qn. What are the specific traditional practices that Maasai women engage in birth preparedness during pregnancy, delivery, and the postpartum period? Including the type of food they eat, use of traditional medicines, reproductive, etc.

### **iv. Conclusion.**

Thank the participants for their time and participation in the discussion.
